# Supplementary figures and images for: SNP-Associated Substitutions of Amino Acid Residues in the dNTP Selection Subdomain Decrease Polβ Polymerase Activity
Source: MDPI journal article supplement (doi:10.3390/biom14050547), 2024-05-02

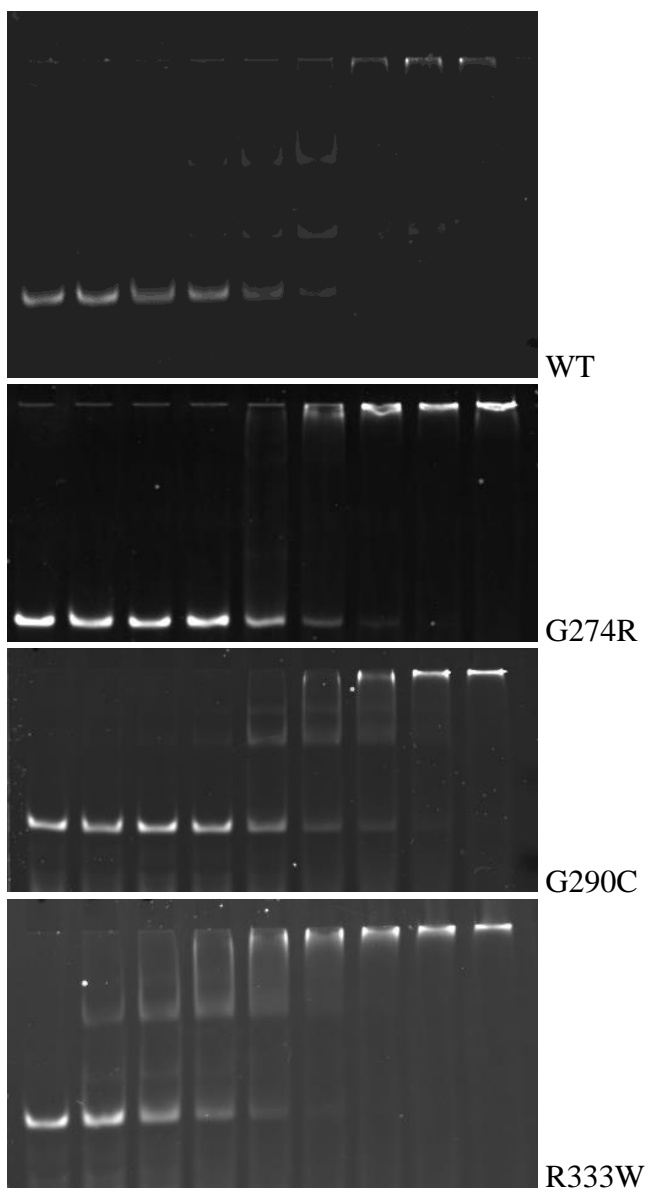

The original figures in Figure 4.

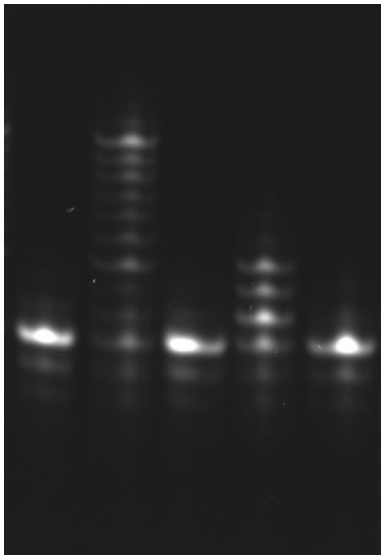

The original figures in Figure 7.

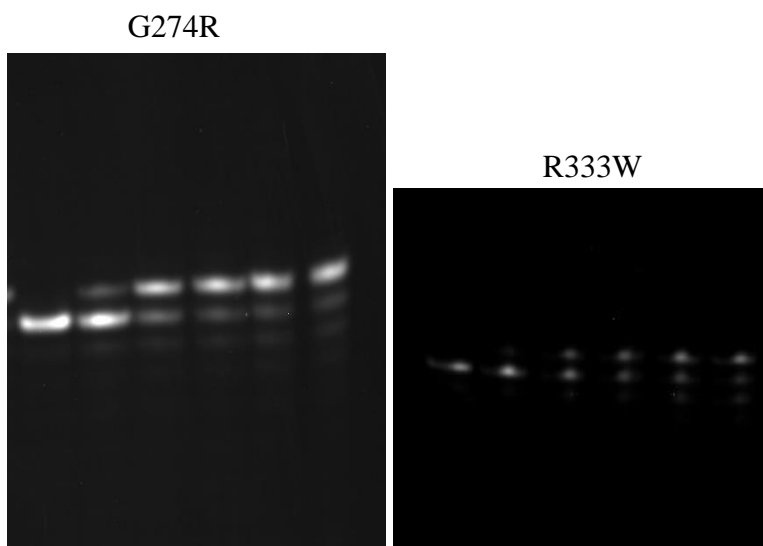

The original figures in Figure 9.

Supplement: s1 [file s1]
